# Supplementary material for: Identification and epidemiological analysis of a putative novel hantavirus in Australian flying foxes
Source: Virus Genes. 2024 Oct 11;61(1):71–80. doi: 10.1007/s11262-024-02113-3 (PMC11787259; doi:10.1007/s11262-024-02113-3)
Supplement: Supplementary file 1 — Supplementary file1 (XLSX 19 KB) [file 11262_2024_2113_MOESM1_ESM.xlsx]

## Sheet: Sheet1
Year	Species	Region	Season	Robina
2018	Pteropus alecto	SEQ	Autumn	0
2018	Pteropus alecto	SEQ	Autumn	0
2018	Pteropus alecto	SEQ	Autumn	0
2018	Pteropus alecto	SEQ	Autumn	0
2018	Pteropus alecto	NQ	Autumn	0
2018	Pteropus alecto	SEQ	Autumn	0
2018	Pteropus alecto	SEQ	Autumn	0
2018	Pteropus alecto	SEQ	Autumn	0
2018	Pteropus alecto	NQ	Autumn	0
2018	Pteropus alecto	SEQ	Autumn	0
2018	Pteropus poliocephalus	SEQ	Winter	0
2018	Pteropus alecto	SEQ	Winter	0
2018	Pteropus alecto	SEQ	Winter	0
2018	Pteropus poliocephalus	SEQ	Winter	0
2018	Insectiverous bat	SEQ	Winter	0
2018	Pteropus alecto	SEQ	Winter	0
2018	Pteropus alecto	SEQ	Winter	0
2018	Pteropus alecto	SEQ	Spring	0
2018	Pteropus alecto	SEQ	Spring	0
2018	Pteropus conspicillatus	FNQ	Spring	0
2018	Pteropus alecto	NQ	Spring	0
2018	Pteropus alecto	NQ	Spring	0
2018	Pteropus alecto	SEQ	Spring	0
2018	Pteropus scapulatus	WBB	Spring	0
2018	Pteropus alecto	SEQ	Spring	0
2018	Pteropus alecto	DD	Spring	0
2018	Pteropus alecto	DD	Spring	0
2018	Pteropus alecto	DD	Spring	0
2018	Pteropus scapulatus	SEQ	Spring	0
2018	Pteropus alecto	SEQ	Spring	0
2018	Pteropus alecto	DD	Spring	0
2018	Pteropus alecto	DD	Spring	0
2018	Pteropus alecto	NQ	Spring	0
2018	Pteropus alecto	SEQ	Spring	0
2018	Insectiverous bat	WBB	Spring	0
2018	Pteropus alecto	SEQ	Spring	0
2018	Insectiverous bat	CQ	Spring	0
2018	Pteropus alecto	SEQ	Spring	0
2018	Pteropus alecto	SEQ	Spring	0
2018	Pteropus conspicillatus	FNQ	Spring	0
2018	Pteropus conspicillatus	FNQ	Spring	0
2018	Pteropus alecto	SEQ	Spring	0
2018	Pteropus alecto	CQ	Spring	0
2018	Pteropus alecto	SEQ	Summer	0
2018	Pteropus scapulatus	NQ	Summer	0
2018	Pteropus scapulatus	CQ	Summer	0
2018	Pteropus alecto	NQ	Summer	0
2018	Pteropus alecto	SEQ	Summer	0
2018	Pteropus alecto	SEQ	Summer	0
2018	Pteropus alecto	CQ	Summer	0
2018	Pteropus conspicillatus	FNQ	Summer	0
2018	Pteropus conspicillatus	FNQ	Summer	0
2018	Pteropus alecto	SEQ	Summer	0
2019	Pteropus conspicillatus	FNQ	Summer	0
2019	Pteropus alecto	SEQ	Summer	0
2019	Pteropus alecto	CQ	Summer	0
2019	Pteropus conspicillatus	FNQ	Summer	0
2019	Pteropus alecto	SEQ	Summer	0
2019	Pteropus scapulatus	SEQ	Summer	0
2019	Pteropus alecto	SEQ	Summer	0
2019	Pteropus alecto	SEQ	Summer	0
2019	Pteropus alecto	SEQ	Summer	0
2019	Pteropus alecto	CQ	Autumn	0
2019	Pteropus alecto	SEQ	Autumn	0
2019	Pteropus alecto	SEQ	Autumn	0
2019	Pteropus alecto	WBB	Autumn	0
2019	Pteropus alecto	SEQ	Autumn	0
2019	Insectiverous bat	SEQ	Autumn	0
2019	Pteropus scapulatus	SEQ	Autumn	0
2019	Pteropus alecto	SEQ	Autumn	0
2019	Pteropus alecto	SEQ	Autumn	0
2019	Pteropus alecto	SEQ	Autumn	0
2019	Pteropus alecto	SEQ	Autumn	0
2019	Pteropus alecto	SEQ	Autumn	0
2019	Pteropus alecto	SEQ	Autumn	0
2019	Pteropus alecto	SEQ	Autumn	0
2019	Insectiverous bat	CQ	Autumn	0
2019	Pteropus alecto	SEQ	Autumn	0
2019	Pteropus alecto	SEQ	Autumn	0
2019	Pteropus alecto	NQ	Autumn	0
2019	Insectiverous bat	DD	Autumn	0
2019	Insectiverous bat	FNQ	Autumn	0
2019	Pteropus alecto	SEQ	Autumn	0
2019	Pteropus alecto	SEQ	Autumn	0
2019	Pteropus alecto	SEQ	Autumn	0
2019	Pteropus alecto	FNQ	Autumn	0
2019	Pteropus alecto	CQ	Autumn	0
2019	Pteropus alecto	SEQ	Winter	0
2019	Pteropus alecto	SEQ	Winter	0
2019	Pteropus alecto	SEQ	Winter	0
2019	Pteropus alecto	SEQ	Winter	0
2019	Pteropus alecto	WBB	Winter	0
2019	Pteropus alecto	FNQ	Winter	0
2019	Pteropus alecto	SEQ	Winter	0
2019	Pteropus alecto	SEQ	Winter	0
2019	Pteropus scapulatus	SEQ	Winter	0
2019	Pteropus alecto	SEQ	Winter	0
2019	Pteropus alecto	SEQ	Winter	0
2019	Pteropus alecto	SEQ	Winter	0
2019	Pteropus alecto	SEQ	Winter	1
2019	Pteropus alecto	SEQ	Winter	0
2019	Pteropus alecto	SEQ	Winter	0
2019	Pteropus scapulatus	SEQ	Winter	0
2019	Pteropus alecto	SEQ	Winter	0
2019	Pteropus alecto	SEQ	Winter	0
2019	Pteropus alecto	SEQ	Winter	0
2019	Pteropus alecto	SEQ	Winter	0
2019	Pteropus alecto	SEQ	Winter	0
2019	Pteropus alecto	SEQ	Winter	0
2019	Pteropus alecto	SEQ	Winter	0
2019	Pteropus alecto	SEQ	Winter	0
2019	Pteropus poliocephalus	SEQ	Winter	0
2019	Pteropus alecto	SEQ	Winter	1
2019	Pteropus alecto	SEQ	Winter	0
2019	Pteropus alecto	SEQ	Winter	0
2019	Insectiverous bat	SEQ	Winter	0
2019	Pteropus alecto	DD	Winter	0
2019	Pteropus alecto	WBB	Winter	0
2019	Pteropus alecto	SEQ	Winter	0
2019	Pteropus alecto	SEQ	Winter	1
2019	Pteropus alecto	SEQ	Winter	1
2019	Pteropus alecto	SEQ	Spring	0
2019	Pteropus scapulatus	SEQ	Spring	0
2019	Pteropus alecto	SEQ	Spring	0
2019	Pteropus alecto	SEQ	Spring	0
2019	Pteropus poliocephalus	SEQ	Spring	0
2019	Pteropus poliocephalus	SEQ	Spring	0
2019	Pteropus alecto	SEQ	Spring	0
2019	Pteropus alecto	SEQ	Spring	0
2019	Pteropus alecto	SEQ	Spring	0
2019	Pteropus alecto	SEQ	Spring	0
2019	Pteropus poliocephalus	SEQ	Spring	0
2019	Pteropus poliocephalus	SEQ	Spring	0
2019	Pteropus alecto	CQ	Spring	0
2019	Pteropus alecto	NQ	Spring	0
2019	Pteropus alecto	WBB	Spring	0
2019	Pteropus alecto	WBB	Spring	0
2019	Pteropus alecto	SEQ	Spring	0
2019	Pteropus alecto	SEQ	Spring	0
2019	Pteropus alecto	SEQ	Spring	0
2019	Pteropus alecto	SEQ	Spring	0
2019	Pteropus poliocephalus	SEQ	Spring	0
2019	Pteropus alecto	SEQ	Spring	0
2019	Pteropus alecto	SEQ	Spring	0
2019	Pteropus poliocephalus	SEQ	Spring	0
2019	Pteropus alecto	SEQ	Spring	0
2019	Pteropus poliocephalus	SEQ	Spring	0
2019	Pteropus alecto	SEQ	Spring	0
2019	Pteropus scapulatus	WBB	Spring	0
2019	Pteropus alecto	SEQ	Spring	0
2019	Pteropus alecto	SEQ	Spring	0
2019	Pteropus alecto	SEQ	Spring	0
2019	Pteropus alecto	SEQ	Spring	0
2019	Pteropus alecto	SEQ	Spring	0
2019	Pteropus poliocephalus	WBB	Spring	0
2019	Pteropus poliocephalus	WBB	Spring	0
2019	Pteropus alecto	SEQ	Spring	0
2019	Pteropus scapulatus	SEQ	Spring	0
2019	Pteropus poliocephalus	SEQ	Spring	1
2019	Pteropus poliocephalus	SEQ	Spring	0
2019	Pteropus alecto	SEQ	Spring	1
2019	Pteropus alecto	SEQ	Spring	0
2019	Pteropus scapulatus	SEQ	Spring	0
2019	Pteropus poliocephalus	SEQ	Spring	0
2019	Pteropus alecto	SEQ	Spring	0
2019	Pteropus poliocephalus	SEQ	Spring	0
2019	Pteropus poliocephalus	SEQ	Spring	0
2019	Pteropus poliocephalus	SEQ	Spring	0
2019	Pteropus alecto	SEQ	Spring	0
2019	Pteropus alecto	SEQ	Spring	0
2019	Pteropus poliocephalus	SEQ	Spring	0
2019	Pteropus alecto	SEQ	Spring	0
2019	Pteropus poliocephalus	SEQ	Spring	0
2019	Pteropus alecto	WBB	Spring	0
2019	Pteropus poliocephalus	SEQ	Spring	0
2019	Pteropus poliocephalus	SEQ	Spring	0
2019	Pteropus alecto	SEQ	Spring	0
2019	Pteropus alecto	SEQ	Spring	0
2019	Pteropus alecto	WBB	Spring	0
2019	Pteropus alecto	SEQ	Spring	0
2019	Pteropus alecto	SEQ	Spring	0
2019	Pteropus poliocephalus	WBB	Spring	0
2019	Pteropus alecto	DD	Spring	0
2019	Pteropus poliocephalus	SEQ	Spring	0
2019	Pteropus poliocephalus	WBB	Spring	0
2019	Pteropus alecto	SEQ	Spring	0
2019	Pteropus poliocephalus	SEQ	Spring	0
2019	Pteropus alecto	SEQ	Spring	0
2019	Pteropus poliocephalus	WBB	Spring	0
2019	Pteropus scapulatus	DD	Spring	0
2019	Pteropus alecto	SEQ	Spring	0
2019	Pteropus alecto	SEQ	Spring	0
2019	Pteropus alecto	SEQ	Spring	0
2019	Pteropus scapulatus	SEQ	Spring	0
2019	Pteropus alecto	SEQ	Spring	0
2019	Pteropus alecto	SEQ	Spring	0
2019	Pteropus alecto	SEQ	Spring	0
2019	Pteropus alecto	WBB	Spring	0
2019	Pteropus alecto	SEQ	Spring	0
2019	Pteropus poliocephalus	SEQ	Spring	0
2019	Pteropus alecto	SEQ	Spring	0
2019	Pteropus alecto	SEQ	Spring	0
2019	Pteropus scapulatus	FNQ	Spring	0
2019	Pteropus alecto	CQ	Spring	0
2019	Pteropus alecto	SEQ	Spring	0
2019	Pteropus alecto	SEQ	Spring	0
2019	Pteropus poliocephalus	SEQ	Spring	0
2019	Pteropus poliocephalus	SEQ	Spring	0
2019	Pteropus alecto	CQ	Spring	1
2019	Pteropus alecto	SEQ	Spring	0
2019	Pteropus alecto	SEQ	Spring	0
2019	Pteropus alecto	CQ	Spring	0
2019	Pteropus alecto	SEQ	Spring	0
2019	Insectiverous bat	SEQ	Spring	0
2019	Pteropus alecto	DD	Spring	1
2019	Pteropus alecto	DD	Spring	0
2019	Pteropus alecto	DD	Spring	1
2019	Pteropus scapulatus	SEQ	Spring	0
2019	Pteropus poliocephalus	WBB	Spring	0
2019	Pteropus alecto	SEQ	Spring	0
2019	Pteropus alecto	SEQ	Spring	0
2019	Pteropus poliocephalus	SEQ	Spring	0
2019	Pteropus alecto	WBB	Spring	0
2019	Pteropus scapulatus	NQ	Summer	0
2019	Pteropus scapulatus	NQ	Summer	0
2019	Pteropus alecto	SEQ	Summer	0
2019	Pteropus alecto	SEQ	Summer	0
2019	Pteropus alecto	SEQ	Summer	0
2019	Pteropus alecto	SEQ	Summer	0
2019	Pteropus alecto	SEQ	Summer	1
2019	Pteropus alecto	SEQ	Summer	0
2019	Insectiverous bat	SEQ	Summer	0
2019	Pteropus alecto	SEQ	Summer	0
2020	Pteropus alecto	SEQ	Summer	0
2020	Pteropus alecto	SEQ	Summer	0
2020	Insectiverous bat	SEQ	Summer	0
2020	Pteropus alecto	NQ	Summer	0
2020	Pteropus poliocephalus	DD	Summer	0
2020	Pteropus alecto	SEQ	Summer	0
2020	Insectiverous bat	SEQ	Summer	0
2020	Pteropus alecto	SEQ	Summer	0
2020	Pteropus alecto	SEQ	Summer	0
2020	Pteropus alecto	NQ	Summer	0
2020	Pteropus scapulatus	SEQ	Summer	0
2020	Pteropus scapulatus	SEQ	Autumn	0
2020	Pteropus alecto	SEQ	Autumn	0
2020	Pteropus alecto	SEQ	Autumn	1
2020	Pteropus alecto	SEQ	Autumn	0
2020	Pteropus alecto	SEQ	Autumn	0
2020	Pteropus alecto	NQ	Autumn	0
2020	Pteropus alecto	SEQ	Autumn	0
2020	Pteropus alecto	SEQ	Autumn	0
2020	Pteropus alecto	SEQ	Autumn	1
2020	Pteropus alecto	CQ	Autumn	0
2020	Insectiverous bat	DD	Autumn	0
2020	Insectiverous bat	NQ	Autumn	0
2020	Pteropus alecto	WBB	Autumn	0
2020	Pteropus poliocephalus	SEQ	Autumn	0
2020	Pteropus poliocephalus	SEQ	Autumn	0
2020	Pteropus alecto	SEQ	Autumn	0
2020	Pteropus scapulatus	SEQ	Autumn	1
2020	Pteropus poliocephalus	SEQ	Autumn	0
2020	Pteropus alecto	SEQ	Autumn	1
2020	Pteropus alecto	WBB	Autumn	0
2020	Pteropus alecto	SEQ	Autumn	0
2020	Pteropus alecto	SEQ	Autumn	0
2020	Pteropus scapulatus	FNQ	Autumn	0
2020	Pteropus scapulatus	FNQ	Autumn	0
2020	Pteropus alecto	NQ	Autumn	1
2020	Pteropus alecto	NQ	Autumn	0
2020	Pteropus alecto	NQ	Autumn	0
2020	Pteropus alecto	NQ	Autumn	0
2020	Pteropus alecto	SEQ	Winter	1
2020	Insectiverous bat	SEQ	Winter	0
2020	Pteropus alecto	SEQ	Winter	0
2020	Insectiverous bat	SEQ	Winter	0
2020	Pteropus alecto	SEQ	Winter	0
2020	Insectiverous bat	SEQ	Winter	0
2020	Pteropus alecto	SEQ	Winter	0
2020	Pteropus poliocephalus	SEQ	Winter	0
2020	Pteropus alecto	SEQ	Winter	1
2020	Pteropus alecto	SEQ	Winter	0
2020	Insectiverous bat	SEQ	Winter	0
2020	Pteropus poliocephalus	SEQ	Winter	0
2020	Pteropus alecto	SEQ	Spring	0
2020	Pteropus alecto	SEQ	Spring	0
2020	Pteropus alecto	SEQ	Spring	0
2020	Pteropus alecto	SEQ	Spring	0
2020	Pteropus alecto	SEQ	Spring	0
2020	Pteropus alecto	SEQ	Spring	0
2020	Pteropus alecto	SEQ	Spring	0
2020	Insectiverous bat	FNQ	Spring	0
2020	Pteropus alecto	SEQ	Spring	0
2020	Pteropus alecto	SEQ	Spring	0
2020	Pteropus scapulatus	DD	Spring	0
2020	Insectiverous bat	CQ	Spring	0
2020	Pteropus scapulatus	FNQ	Spring	0
2020	Pteropus alecto	SEQ	Spring	0
2020	Pteropus scapulatus	DD	Spring	0
2020	Pteropus alecto	SEQ	Spring	0
2020	Pteropus alecto	SEQ	Spring	0
2020	Pteropus alecto	SEQ	Spring	0
2020	Pteropus alecto	SEQ	Summer	0
2020	Pteropus scapulatus	FNQ	Summer	0
2020	Pteropus alecto	SEQ	Summer	0
2020	Pteropus alecto	DD	Summer	0
2020	Insectiverous bat	SEQ	Summer	0
2020	Insectiverous bat	SEQ	Summer	0
2020	Pteropus scapulatus	SEQ	Summer	0
2020	Pteropus scapulatus	SEQ	Summer	0
2020	Pteropus scapulatus	FNQ	Summer	0
2020	Pteropus alecto	SEQ	Summer	0
2020	Pteropus alecto	SEQ	Summer	0
2020	Pteropus scapulatus	SEQ	Summer	0
2020	Pteropus alecto	SEQ	Summer	0
2020	Pteropus alecto	SEQ	Summer	0
2020	Pteropus conspicillatus	FNQ	Summer	0
2020	Pteropus alecto	SEQ	Summer	0
2021	Pteropus alecto	SEQ	Summer	0
2021	Pteropus alecto	SEQ	Summer	0
2021	Pteropus alecto	SEQ	Summer	0
2021	Pteropus alecto	SEQ	Summer	0
2021	Pteropus alecto	SEQ	Summer	0
2021	Pteropus scapulatus	SEQ	Summer	0
2021	Pteropus scapulatus	SEQ	Summer	0
2021	Pteropus scapulatus	SEQ	Summer	0
2021	Pteropus alecto	SEQ	Summer	0
2021	Pteropus alecto	SEQ	Summer	0
2021	Pteropus alecto	SEQ	Summer	0
2021	Pteropus alecto	SEQ	Summer	0
2021	Pteropus alecto	SEQ	Summer	0
2021	Pteropus alecto	SEQ	Summer	0
2021	Pteropus alecto	SEQ	Summer	0
2021	Pteropus scapulatus	SEQ	Summer	0
2021	Pteropus scapulatus	SEQ	Summer	0
2021	Pteropus scapulatus	SEQ	Summer	0
2021	Pteropus scapulatus	SEQ	Summer	0
2021	Pteropus scapulatus	FNQ	Summer	0
2021	Pteropus alecto	SEQ	Summer	0
2021	Pteropus scapulatus	SEQ	Summer	0
2021	Pteropus scapulatus	SEQ	Summer	0
2021	Pteropus alecto	SEQ	Summer	0
2021	Insectiverous bat	SEQ	Summer	0
2021	Pteropus scapulatus	SEQ	Summer	0
2021	Pteropus scapulatus	SEQ	Summer	0
2021	Pteropus scapulatus	SEQ	Summer	0
2021	Pteropus scapulatus	SEQ	Summer	0
2021	Pteropus scapulatus	SEQ	Summer	0
2021	Pteropus alecto	SEQ	Summer	0
2021	Pteropus scapulatus	SEQ	Summer	0
2021	Pteropus scapulatus	SEQ	Summer	0
2021	Pteropus scapulatus	SEQ	Summer	0
2021	Pteropus alecto	CQ	Summer	0
2021	Pteropus scapulatus	SEQ	Summer	0
2021	Pteropus alecto	SEQ	Summer	0
2021	Pteropus alecto	SEQ	Summer	0
2021	Pteropus scapulatus	SEQ	Summer	0
2021	Pteropus scapulatus	SEQ	Summer	1
2021	Pteropus scapulatus	SEQ	Summer	0
2021	Pteropus scapulatus	SEQ	Summer	0
2021	Pteropus scapulatus	SEQ	Summer	0
2021	Pteropus scapulatus	SEQ	Summer	1
2021	Pteropus scapulatus	SEQ	Summer	0
2021	Pteropus scapulatus	SEQ	Summer	0
2021	Pteropus scapulatus	SEQ	Summer	0
2021	Pteropus alecto	SEQ	Summer	0
2021	Pteropus scapulatus	SEQ	Summer	0
2022	Pteropus conspicillatus	FNQ	Summer	0
2022	Pteropus alecto	SEQ	Summer	0
2022	Pteropus alecto	SEQ	Summer	0
2022	Pteropus scapulatus	SEQ	Summer	0
2022	Pteropus scapulatus	NQ	Summer	0
2022	Pteropus scapulatus	NQ	Summer	0
2022	Pteropus alecto	SEQ	Summer	0
2022	Pteropus alecto	SEQ	Summer	0
2022	Insectiverous bat	SEQ	Summer	0
2022	Pteropus alecto	SEQ	Summer	0
2022	Pteropus alecto	SEQ	Summer	0
2022	Pteropus alecto	DD	Summer	0
2022	Insectiverous bat	SEQ	Summer	0
2022	Pteropus alecto	WBB	Summer	0
2022	Pteropus alecto	SEQ	Summer	0
2022	Pteropus scapulatus	SEQ	Summer	0
2022	Pteropus alecto	SEQ	Summer	0
2022	Pteropus scapulatus	SEQ	Summer	0
2022	Pteropus scapulatus	SEQ	Summer	0
2022	Insectiverous bat	SEQ	Summer	0
2022	Pteropus alecto	SEQ	Summer	0
2022	Pteropus alecto	SEQ	Summer	0
2022	Pteropus alecto	CQ	Autumn	0
2022	Pteropus alecto	SEQ	Autumn	0
2022	Pteropus poliocephalus	SEQ	Autumn	0
2022	Pteropus poliocephalus	SEQ	Autumn	0
2022	Pteropus alecto	SEQ	Autumn	0
2022	Pteropus alecto	SEQ	Autumn	0
2022	Insectiverous bat	CQ	Autumn	0
2022	Insectiverous bat	SEQ	Autumn	0
2022	Pteropus alecto	SEQ	Autumn	0
2022	Pteropus alecto	SEQ	Autumn	0
2022	Pteropus alecto	SEQ	Autumn	0
2022	Pteropus alecto	SEQ	Autumn	0
2022	Pteropus poliocephalus	SEQ	Autumn	1
2022	Pteropus alecto	SEQ	Winter	0
2022	Pteropus alecto	SEQ	Winter	0
2022	Pteropus alecto	SEQ	Winter	0
2022	Pteropus alecto	SEQ	Winter	0
2022	Pteropus alecto	SEQ	Winter	0
2022	Pteropus poliocephalus	SEQ	Winter	0
2022	Pteropus poliocephalus	SEQ	Winter	0
2022	Pteropus poliocephalus	SEQ	Winter	0
2022	Pteropus alecto	SEQ	Winter	0
2022	Pteropus alecto	SEQ	Winter	0
2022	Pteropus poliocephalus	SEQ	Winter	0
2022	Pteropus poliocephalus	SEQ	Winter	0
2022	Pteropus alecto	SEQ	Winter	0
2022	Pteropus alecto	SEQ	Winter	0
2022	Pteropus alecto	SEQ	Winter	0
2022	Pteropus alecto	SEQ	Winter	0
2022	Pteropus alecto	SEQ	Winter	0
2022	Pteropus alecto	SEQ	Winter	0
2022	Pteropus alecto	SEQ	Winter	0
2022	Pteropus alecto	SEQ	Winter	0
2022	Pteropus alecto	SEQ	Winter	0
2022	Pteropus alecto	SEQ	Winter	0
2022	Pteropus alecto	SEQ	Winter	0
2022	Pteropus alecto	SEQ	Winter	0
2022	Pteropus alecto	SEQ	Winter	0
2022	Insectiverous bat	SEQ	Winter	0
2022	Pteropus alecto	DD	Winter	0
2022	Pteropus poliocephalus	DD	Spring	0
2022	Pteropus alecto	CQ	Spring	0
2022	Pteropus alecto	SEQ	Spring	0
2022	Pteropus poliocephalus	SEQ	Spring	0
2022	Pteropus alecto	CQ	Spring	0
2022	Pteropus scapulatus	SEQ	Spring	0
2022	Pteropus scapulatus	DD	Spring	0
2022	Pteropus alecto	DD	Spring	0
2022	Pteropus alecto	SEQ	Spring	0
2022	Pteropus alecto	SEQ	Spring	0
2022	Pteropus alecto	SEQ	Spring	0
2022	Pteropus alecto	NQ	Spring	0
2022	Pteropus alecto	SEQ	Spring	0
2022	Pteropus alecto	SEQ	Spring	0
2022	Pteropus alecto	SEQ	Spring	0
2022	Pteropus alecto	DD	Spring	0
2022	Pteropus alecto	SEQ	Spring	0
2022	Pteropus alecto	SEQ	Spring	0
2022	Insectiverous bat	SEQ	Spring	0
2022	Pteropus alecto	SEQ	Spring	0
2022	Pteropus alecto	SEQ	Spring	0
2022	Pteropus conspicillatus	FNQ	Summer	0
2022	Pteropus conspicillatus	FNQ	Summer	0
2022	Pteropus alecto	SEQ	Summer	0
2023	Pteropus alecto	SEQ	Summer	0
2023	Pteropus alecto	SEQ	Summer	0
2023	Pteropus alecto	WBB	Summer	0
2023	Pteropus alecto	SEQ	Summer	0
2023	Pteropus alecto	NQ	Summer	0
2023	Pteropus alecto	NQ	Summer	0
2023	Pteropus alecto	SEQ	Summer	0
2023	Pteropus alecto	SEQ	Summer	0
2023	Pteropus alecto	NQ	Autumn	0
2023	Insectiverous bat	SEQ	Autumn	0
2023	Pteropus alecto	SEQ	Autumn	0
2023	Pteropus scapulatus	SEQ	Autumn	0
2023	Pteropus alecto	SEQ	Autumn	0
2023	Pteropus scapulatus	SEQ	Autumn	0
2023	Pteropus alecto	SEQ	Autumn	0
2023	Insectiverous bat	SEQ	Autumn	0
2023	Pteropus scapulatus	SEQ	Autumn	0
2023	Pteropus alecto	SEQ	Autumn	0
2023	Pteropus alecto	SEQ	Autumn	0
2023	Pteropus alecto	SEQ	Autumn	0
2023	Insectiverous bat	SEQ	Autumn	0
2023	Pteropus scapulatus	NQ	Autumn	0
2023	Pteropus alecto	SEQ	Autumn	1
2023	Insectiverous bat	SEQ	Autumn	0
2023	Insectiverous bat	SEQ	Autumn	0
2023	Insectiverous bat	SEQ	Autumn	0
2023	Insectiverous bat	WBB	Autumn	0
2023	Pteropus conspicillatus	FNQ	Autumn	0
2023	Pteropus alecto	WBB	Autumn	0
2023	Pteropus poliocephalus	SEQ	Autumn	0
2023	Pteropus alecto	SEQ	Autumn	0
2023	Insectiverous bat	SEQ	Autumn	0
2023	Insectiverous bat	SEQ	Winter	0
2023	Pteropus alecto	SEQ	Winter	0
2023	Pteropus poliocephalus	SEQ	Winter	0
2023	Pteropus alecto	SEQ	Winter	0
2023	Pteropus alecto	SEQ	Winter	0
2023	Pteropus poliocephalus	SEQ	Winter	0
2023	Pteropus alecto	SEQ	Winter	0
2023	Pteropus scapulatus	NQ	Winter	0
2023	Pteropus alecto	SEQ	Winter	0
2023	Pteropus conspicillatus	FNQ	Winter	0
2023	Pteropus conspicillatus	FNQ	Winter	0
2023	Pteropus alecto	SEQ	Winter	0
2023	Pteropus conspicillatus	FNQ	Winter	0
2023	Pteropus alecto	FNQ	Winter	0
2023	Pteropus alecto	SEQ	Winter	0
2023	Pteropus alecto	SEQ	Winter	0
2023	Pteropus alecto	NQ	Winter	0
2023	Pteropus alecto	SEQ	Winter	0
2023	Pteropus conspicillatus	FNQ	Winter	0
2023	Pteropus poliocephalus	SEQ	Winter	0
2023	Pteropus alecto	SEQ	Winter	0
2023	Pteropus alecto	SEQ	Spring	0
2023	Pteropus alecto	SEQ	Spring	0
2023	Insectiverous bat	SEQ	Spring	0
2023	Pteropus alecto	NQ	Spring	0
2023	Pteropus scapulatus	CQ	Spring	0
2023	Pteropus alecto	NQ	Spring	0
2023	Pteropus scapulatus	NQ	Spring	0
2023	Insectiverous bat	SEQ	Spring	0
2023	Pteropus alecto	SEQ	Spring	0
2023	Pteropus alecto	WBB	Spring	0
